# Supplementary material
Source: PubMed Central journal article supplement (PMC1142413)

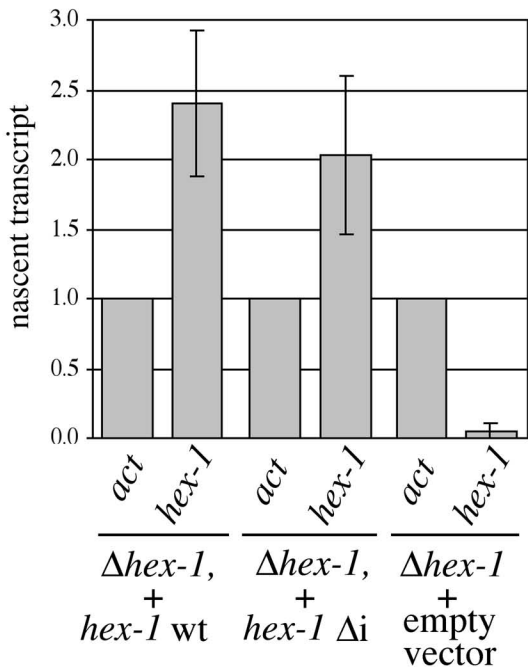

Sup. Figure 1

Supplement: mbc_E04-10-0937v2_2.pdf [file mbc_E04-10-0937v2_2.pdf]
